# Supplementary material
Source: PubMed Central journal article supplement (PMC3726162)

**Supplemental Figure S1.** Bone marrow harvested from *MerTK*<sup>+/+</sup> or *MerTK*<sup>-/-</sup> donors was delivered by tail vein injection into lethally-irradiated 6 week old female *MMTV-PyVmT* recipients. Mammary tumors harvested at 19.8 weeks of age were assessed by immunofluorescent detection of TUNEL-positive cells. Values shown represent average number of TUNEL-positive tumor cells per 400X field  $\pm$  S.D., N = 6 per genotype, 9-10 fields per sample. Differences observed were not statistically significant, as determined using the Student's T-test.

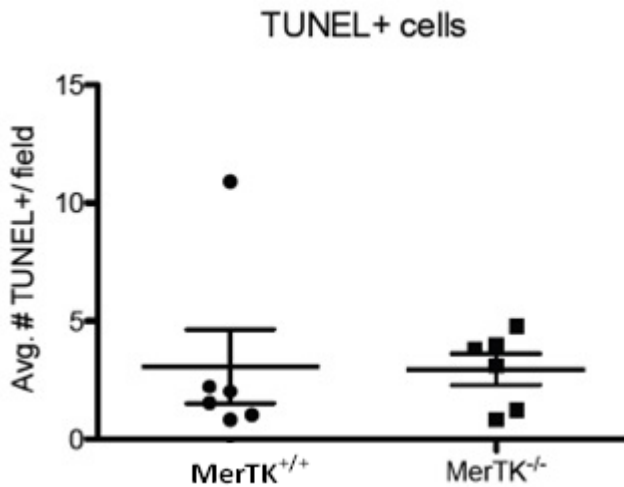

**Supplemental Figure S2.** B16:F10 cells ( $1 \times 10^3$ ) in 100  $\mu$ l sterile PBS were injected into the intraperitoneal cavity of *MerTK*<sup>+/+</sup> (left two bars) or *MerTK*<sup>-/-</sup> (right two bars) mice. After 4 days, peritoneal lavage was used to collect cells from the peritoneal area, RNA harvested from the collected cells was assessed by qPCR for levels of IL10 and IL12p40 mRNA. Serum collected from mice 4 days after peritoneal inoculation was assessed for IL-6 by ELISA. Values shown represent average  $\pm$  S.D., N = 6 per group. Statistical significance of differences were assessed using two-way ANOVA.

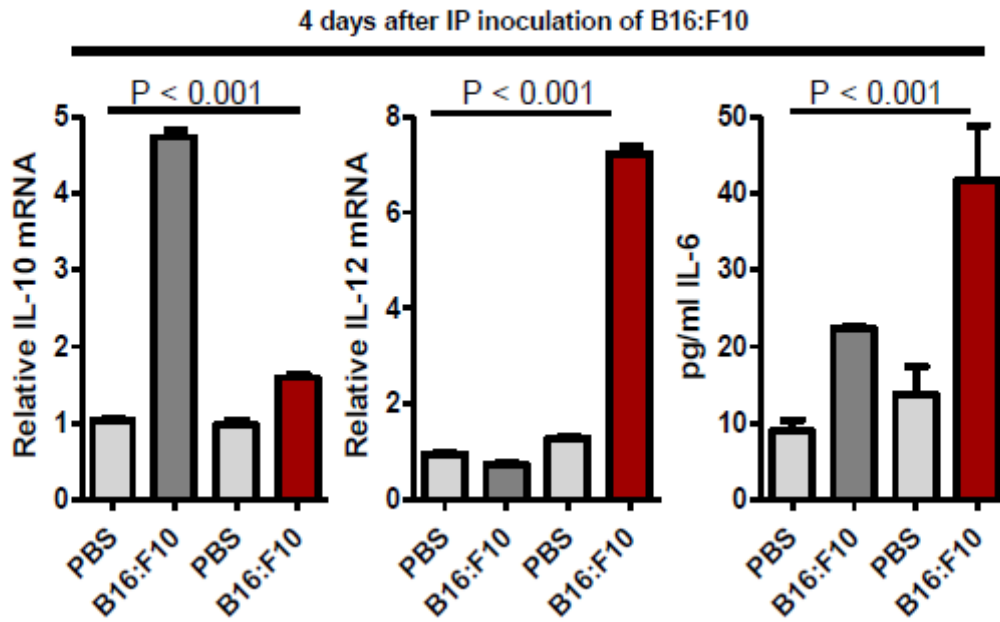

**Supplemental Figure S3.** Bone marrow harvested from *MerTK*<sup>+/+</sup> or *MerTK*<sup>-/-</sup> donors was delivered by tail vein injection into lethally-irradiated 6 week old female *MMTV-PyVmt* recipients. Mammary tumors harvested at 19.8 weeks of age were assessed by immunofluorescent detection of F4/80-iNOS double positive M1 macrophages and F4/80-Arg1 double positive M2 macrophages. Values shown represent average M2:M1 ratio [M2 macrophages divided by M1 macrophages] per 400 X field,  $\pm$  S.D., N = 6 per genotype, 8-9 fields per sample. Differences observed were not statistically significant, as determined using the Student's T-test.

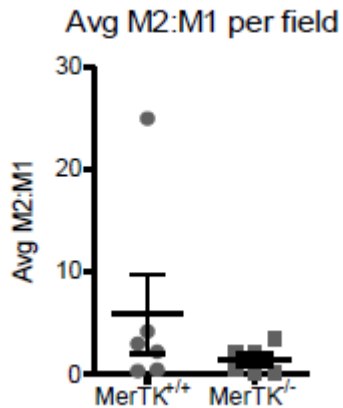

Supplement: JCI67655sd.pdf [file JCI67655sd.pdf]
